# Supplementary material for: SOX2 Is a Marker for Stem-like Tumor Cells in Bladder Cancer
Source: PubMed Central journal article supplement — Stem Cell Reports. 2017 Aug 8;9(2):429–37. doi: 10.1016/j.stemcr.2017.07.004 (PMC5550032; doi:10.1016/j.stemcr.2017.07.004), 2017-08-08
Supplement: mmc1.pdf [file mmc1.pdf]

**Stem Cell Reports, Volume 9**

**Supplemental Information**

**SOX2 Is a Marker for Stem-like Tumor Cells in Bladder Cancer**

**Fengyu Zhu, Weiqing Qian, Haojie Zhang, Yu Liang, Mingqing Wu, Yingyin Zhang, Xiuhong Zhang, Qian Gao, and Yang Li**

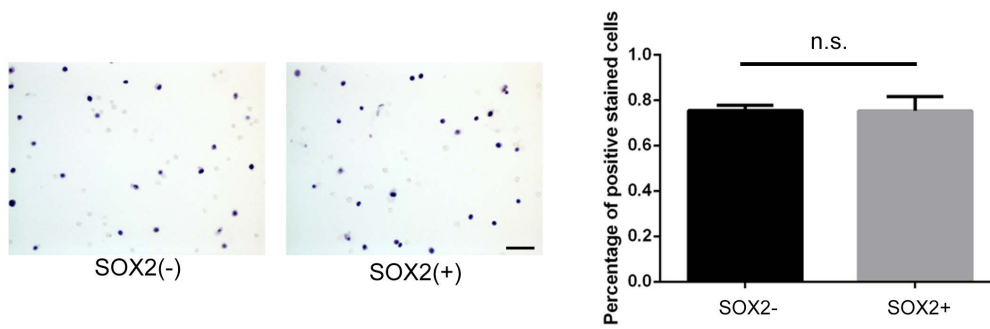

**Figure S1 related to Figure 2. Validation of the cell viability after sorting.** SOX2<sup>+/-</sup> cells were stained by trypan blue after sorting and percentage of positive stained cells were calculated by counting 500 cells from randomly selected fields of each group, respectively. n.s.: no significant difference. Scale bars, 50  $\mu$ m. Error bars represent the S.D. of three independent experiments.

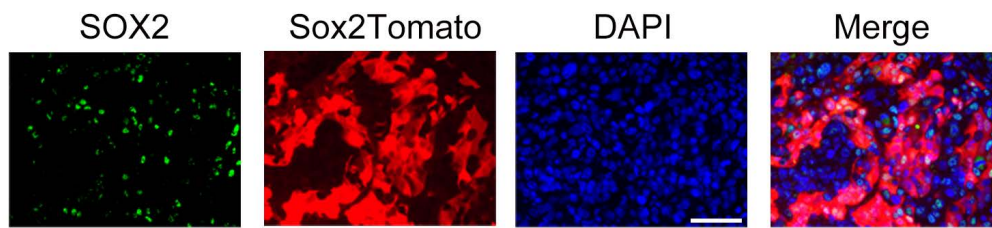

**Supplementary Figure S2, related to Figure 3, Immunofluorescent staining of SOX2 after tracing.** Representative image shows immunostaining by SOX2 antibodies after tracing period. Scale bars, 50  $\mu\text{m}$ .

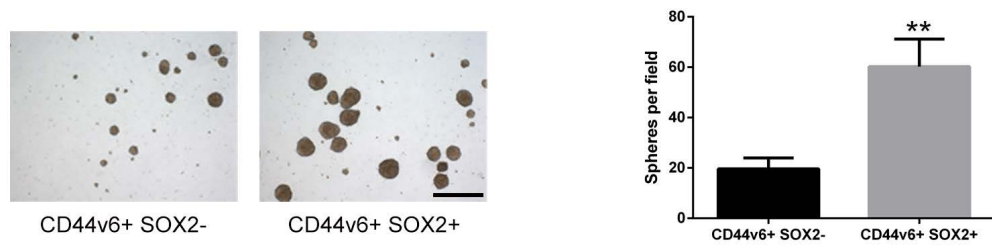

**Supplementary Figure S3, related to Figure 3, Sphere formation of CD44v6+Tomato+(SOX2+) and CD44v6+Tomato-(SOX2-) cells.** CD44V6+Tom+(SOX2+) and CD44V6+Tom-(SOX2-) cells were FACS sorted and cultured in stem cell medium. Cultures at 10 days are shown and the sphere numbers are plotted. \*\*,  $p < 0.01$ , student t-test. Scale bars, 250  $\mu\text{m}$ . Error bars represent the S.D. of three independent experiments.

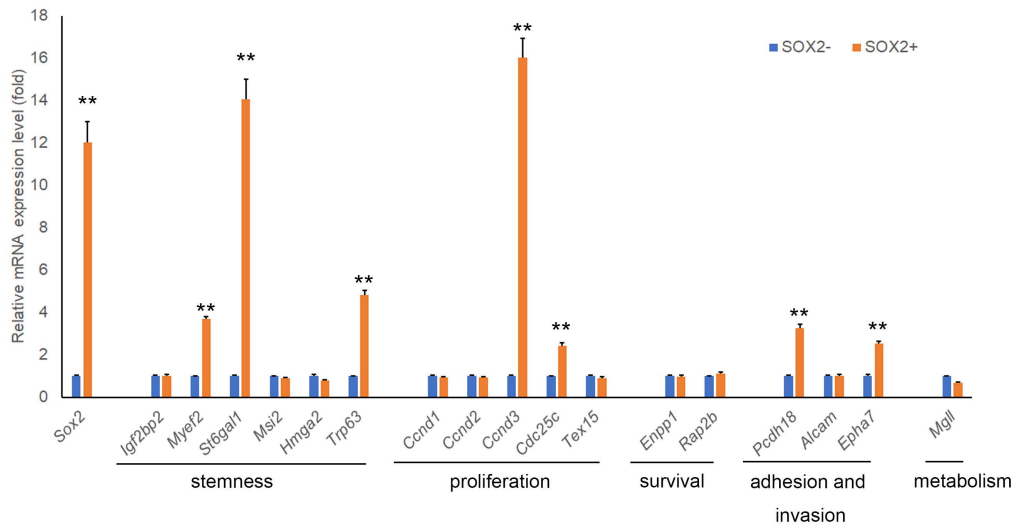

**Supplementary Figure S4, related to Figure 3, Expression pattern of SOX2 target genes.** CD44v6+Tomato+(SOX2+) and CD44v6+Tomato-(SOX2-) cells were sorted by FACS, and mRNA level of SOX2 target genes were examined by quantitative RT-PCR. \*\*,  $p < 0.01$ , student t-test. Error bars represent the S.D. of three independent experiments.

## Supplemental Experimental Procedures

### *Mice model*

*Sox2-Cre<sup>ERT2</sup>*, *R26<sup>tdTomato</sup>* and *ROSA-DTA* mice were obtained from Jackson Laboratory. BBN(sc-486264, Santa Cruz) was dissolved in drinking water at a concentration of 0.05% (w/v) and provided to transgenic male mice for indicated times as previous described(Shin et al., 2014). Tamoxifen (T5648) were purchased from Sigma. For transplantation assays into immunodeficient mice, the different FACS-isolated cell populations (*Sox2 Tomato*<sup>+/-</sup>) from BBN-induced mice BCa tissue were collected in 4 °C medium. For limited dilution assay, different dilutions (64,000/16,000/4,000/1,000) of cells resuspended in 50 µl of Matrigel (Corning, 354230) were injected subcutaneously into BALB/cASlac-nu nude mice (Shanghai Laboratory Animals Center, SLAC). Secondary tumors were monitored weekly until mice presented signs of distress, and the mice were sacrificed. All animal procedures were performed under a protocol approved by the Laboratory Animal Center of Anhui Medical University and in accordance with National Institutes of Health guide for the care and use of Laboratory animals (NIH Publications No. 8023, revised 1978).

### *Clinical sample*

22 human BCa samples were obtained from Department of Urology, Huadong Hospital, Fudan University with patients' informed consent. The pathological condition of the BPH samples was determined by experienced urologists at Huadong Hospital.

### *Immunostaining*

For frozen section, tissues were fixed in 4% paraformaldehyde at 4 °C for 48 h, followed with placing into 30% sucrose overnight and frozen in optimal cutting temperature (OCT) compound (Tissue Tek, Sakura). Frozen 10 mm sections were obtained and processed as previously described. For paraffin sections of bladder cancer tissue samples from mice and human patient were antigen retrieved, blocked and processed as described before(Liu et al., 2016). Hematoxylin–eosin stains were performed using standard histology procedures. The intensity of immunostaining was measured by Image-Pro Plus 6.0 image analysis software (Media Cybernetics). The intensity of each image was calculated by normalizing the average integrated optical density (IOD) with the total selected area of interest (AOI).

| Primary antibodies |                |                |              |            |          |
|--------------------|----------------|----------------|--------------|------------|----------|
| Protein target     | Company        | Catalog Number | Host species | Clonality  | Dilution |
| SOX2               | Abcam          | ab97959        | Rabbit       | polyclonal | 1:100    |
| KRT14              | ProteinTech    | 60320-1-Ig     | Mouse        | monoclonal | 1:150    |
| Human CD44v6       | Abcam          | ab78960        | Mouse        | monoclonal | 1:150    |
| Mouse CD44v6       | Thermo Fisher  | 33-6700        | Mouse        | monoclonal | 1:150    |
| Ki67               | Thermo Fisher  | PA5-19462      | Rabbit       | polyclonal | 1:200    |
| LAMININ            | Abcam          | ab11575        | Rabbit       | polyclonal | 1:200    |
| UroplakinIII       | Abcam          | ab78196        | Mouse        | monoclonal | 1:200    |
| Phospho-Stat3      | Cell signaling | #9134          | Rabbit       | polyclonal | 1:150    |

|                      |             |           |                      |            |       |
|----------------------|-------------|-----------|----------------------|------------|-------|
| CD3                  | Abgent      | AP52283   | Rabbit               | polyclonal | 1:150 |
| Secondary antibodies |             |           |                      |            |       |
| FITC conjugate       | Proteintech | SA00003-2 | Goat anti-rabbit IgG |            | 1:200 |
| FITC conjugate       | Proteintech | SA00003-1 | Goat anti-mouse IgG  |            | 1:200 |
| TRITC conjugate      | Proteintech | SA00007-2 | Goat anti-rabbit IgG |            | 1:200 |

#### FACS isolation and acquisition

Tumours were digested and blocked as previously described (Boumahdi et al., 2014). Immunostaining was performed using APC-conjugated anti-CD44v6 (1:100, BDPharmingen, 559250) by incubation for 30 min at room temperature. Cells were selected based on the expression of Sox2-tdTomato(PE) and/or CD44v6(APC). Gates for fluorescence fractionations were established using unstained and isotype controls. FACS analysis was performed using FACS Aria and FACSDiva software (BD Biosciences). Sorted cells were collected either in culture medium for *in vivo* transplantation experiments or into lysis buffer for RNA extraction.

#### Sphere formation

FACS-sorted cells were cultured in ultra-low attachment plates (Corning Inc., Corning, NY, USA) at a density of 1,000 cells per well. Cells were cultured in modified serum-free culture mediums reported previously (Zhu et al., 2013). Spheres with a diameter over 20  $\mu\text{m}$  were counted 3 days after plating.

#### Examine of gene expression level

Bladder samples were snap frozen in liquid nitrogen, homogenized with a mortar and pestle, and RNA extracted with the TRIzol (Invitrogen). Quantitative RT-PCR and western blot was performed as previously described (Li et al., 2015; Li et al., 2011). The primers used for RT-PCR is listed below.

| Primer Names | Sequence                       |
|--------------|--------------------------------|
| Sox2 F       | 5'-ACAGATGCAACCGATGCACC-3'     |
| Sox2 R       | 5'-TGGAGTTGTACTGCAGGGCG-3'     |
| CD44v6 F     | 5'- CCTTGGCCACCACTCCTAATAG -3' |
| CD44v6 R     | 5'- CAGTTGTCCCTTCTGTACATG -3'  |
| Krt14 F      | 5'- AGCGGCAAGAGTGAGATTTCT -3'  |
| Krt14 R      | 5'- CCTCCAGGTTATTCTCCAGGG -3'  |
| Igf2bp2 F    | 5'- GTCCTACTCAAGTCCGGCTAC-3'   |
| Igf2bp2 R    | 5'- CATATTCAGCCAACAGCCCAT-3'   |
| Myef2 F      | 5'- GGGTCCAAGTGGAGTTGGG-3'     |
| Myef2 R      | 5'- GCACTGCCAAGTCTACCAAAG-3'   |
| St6gal1 F    | 5'- CTCCTGTTTGCCATCATCTGC-3'   |
| St6gal1 R    | 5'- GGGTCTTGTTTGCTGTTTGAGA-3'  |
| Msi2 F       | 5'- CTACAGTGCTCAACCGAATTTG-3'  |
| Msi2 R       | 5'- CTGGCCGCGCTTATGTAAT-3'     |
| Hmga2 F      | 5'- GAGCCCTCTCCTAAGAGACCC-3'   |

|          |                                |
|----------|--------------------------------|
| Hmga2 R  | 5'- TTGGCCGTTTTTCTCCAATGG-3'   |
| Trp63 F  | 5'- TACTGCCCCGACCCTTACAT-3'    |
| Trp63 R  | 5'- GCTGAGGAACTCGCTTGTCTG-3'   |
| Ccnd1 F  | 5'- GCGTACCCTGACACCAATCTC-3'   |
| Ccnd1 R  | 5'- CTCCTCTTCGCACTTCTGCTC-3'   |
| Ccnd2 F  | 5'- GAGTGGGAACTGGTAGTGTG-3'    |
| Ccnd2 R  | 5'- CGCACAGAGCGATGAAGGT-3'     |
| Ccnd3 F  | 5'- CGAGCCTCCTACTTCCAGTG-3'    |
| Ccnd3 R  | 5'- GGACAGGTAGCGATCCAGGT-3'    |
| Cdc25c F | 5'- AAAATGCAGCGTTCCTGCTTC-3'   |
| Cdc25c R | 5'- CTTGGGGTCCTAGTGCCTC-3'     |
| Tex15 F  | 5'- TCATACCCACTGGTAACACAGC-3'  |
| Tex15 R  | 5'- GGCAAAACATCACTCAAACCTG-3'  |
| Enpp1 F  | 5'- CTGGTTTTGTCAGTATGTGTGCT-3' |
| Enpp1 R  | 5'- CTCACCGCACCTGAATTTGTT-3'   |
| Rap2b F  | 5'- GCTCACCGTGCAGTTCGTAA-3'    |
| Rap2b R  | 5'- GCTGTAGACGAGAATGAAGCC-3'   |
| Pcdh18 F | 5'- ATGCACTTTAGATTTGCACTTGC-3' |
| Pcdh18 R | 5'- CAATTACCGATCCGACCCTCT-3'   |
| Alcam F  | 5'- GGCAGTGGGTTCGTCATAAAC-3'   |
| Alcam R  | 5'- ATCGCAGAGACATTCAGGGAG-3'   |
| Epha7 F  | 5'- TGACCCTGAAACCTATGAGGAC-3'  |
| Epha7 R  | 5'- ATTCTCCTGCACCAATCACAC-3'   |
| Mgll F   | 5'-ACCATGCTGTGATGCTCTCTG-3'    |
| Mgll R   | 5'-CAAACGCCTCGGGGATAACC-3'     |
| Gapdh F  | 5'- AGGTCGGTGTGAACGGATTG -3'   |
| Gapdh R  | 5'- GGGGTCGTTGATGGCAACA -3'    |

#### *Invasion assay*

BioCoat™ Matrigel invasion chamber was used according to the manufacturer's instruction (BD Biosciences). Briefly,  $4 \times 10^4$  isolated cells by the flow cytometry were resuspended in 100  $\mu$ l of DMEM medium, and seeded in the upper portion of the invasion chamber. The lower portion of the chamber contained 500  $\mu$ l of medium supplemented with 2% FBS and glutamine, which served as a chemoattractant. After 36 h, non-invasive cells were removed from the upper surface of the membrane with a cotton swab. The invasive cells on the lower surface of the membrane were stained with crystal violet, and counted in four separate areas with an inverted microscope (Chen et al., 2011).

#### *Statistics*

Data are presented as the means  $\pm$  standard deviation (S.D.) or standard error (S.E.). All of the statistical analyses were performed using Excel (Microsoft, Redmond, WA) or Prism (GraphPad Software Inc., La Jolla, CA). The two-tailed Student's t-test or one way ANOVA were used and a P-value of  $<0.05$  was considered significant.



### Supplemental References

Boumahdi, S., Driessens, G., Lapouge, G., Rorive, S., Nassar, D., Le Mercier, M., Delatte, B., Caauwe, A., Lenglez, S., Nkusi, E., *et al.* (2014). SOX2 controls tumour initiation and cancer stem-cell functions in squamous-cell carcinoma. *Nature* *511*, 246-250.

Chen, Y., Wang, D., Guo, Z., Zhao, J., Wu, B., Deng, H., Zhou, T., Xiang, H., Gao, F., and Yu, X. (2011). Rho kinase phosphorylation promotes ezrin-mediated metastasis in hepatocellular carcinoma. *Cancer research* *71*, 1721-1729.

Li, Y., Deng, H., Lv, L., Zhang, C., Qian, L., Xiao, J., Zhao, W., Liu, Q., Zhang, D., Wang, Y., *et al.* (2015). The miR-193a-3p-regulated ING5 gene activates the DNA damage response pathway and inhibits multi-chemoresistance in bladder cancer. *Oncotarget* *6*, 10195-10206.

Li, Y., Yu, Y., Zhang, Y., Zhou, Y., Li, C., Zhu, J., Yuan, H., and Lu, H. (2011). MAFIP is a tumor suppressor in cervical cancer that inhibits activation of the nuclear factor-kappa B pathway. *Cancer Sci* *102*, 2043-2050.

Liu, W., Zhou, L., Zhou, C., Zhang, S., Jing, J., Xie, L., Sun, N., Duan, X., Jing, W., Liang, X., *et al.* (2016). GDF11 decreases bone mass by stimulating osteoclastogenesis and inhibiting osteoblast differentiation. *Nature communications* *7*, 12794.

Shin, K., Lim, A., Zhao, C., Sahoo, D., Pan, Y., Spiekerkoetter, E., Liao, J.C., and Beachy, P.A. (2014). Hedgehog signaling restrains bladder cancer progression by eliciting stromal production of urothelial differentiation factors. *Cancer cell* *26*, 521-533.

Zhu, Y.T., Lei, C.Y., Luo, Y., Liu, N., He, C.W., Chen, W., Li, F., Deng, Y.J., and Tan, W.L. (2013). A modified method for isolation of bladder cancer stem cells from a MB49 murine cell line. *BMC urology* *13*, 57.
